# Supplementary material
Source: HighWire-hosted journal article supplement (https://erj.ersjournals.com/content/60/2/2200803)
Supplement: inline-supplementary-material-1 [file inline-supplementary-material-1.pdf]

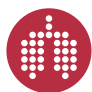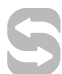

SHAREABLE PDF

# Update June 2022: management of hospitalised adults with coronavirus disease 2019 (COVID-19): a European Respiratory Society living guideline

Nicolas Roche<sup>1,20</sup>, Megan L. Crichton<sup>2</sup>, Pieter C. Goeminne<sup>3</sup>, Bin Cao<sup>4</sup>, Marc Humbert<sup>5</sup>, Michal Shteinberg<sup>6</sup>, Katerina M. Antoniou<sup>7</sup>, Charlotte Suppli Ulrik<sup>8</sup>, Helen Parks<sup>9</sup>, Chen Wang<sup>10</sup>, Thomas Vandendriessche<sup>11</sup>, Jieming Qu<sup>12,13</sup>, Daiana Stolz<sup>14</sup>, Christopher Brightling<sup>15</sup>, Tobias Welte<sup>16</sup>, Stefano Aliberti<sup>17</sup>, Anita K. Simonds<sup>18</sup>, Thomy Tonia<sup>19</sup> and James D. Chalmers<sup>2,20</sup>

<sup>1</sup>Respiratory Medicine, Cochin Hospital, APHP Centre-University of Paris, Cochin Institute (INSERM UMR1016), Paris, France. <sup>2</sup>School of Medicine, University of Dundee, Dundee, UK. <sup>3</sup>Department of Respiratory Medicine, AZ Nikolaas, Sint-Niklaas, Belgium. <sup>4</sup>Department of Respiratory and Critical Care Medicine, Clinical Microbiology and Infectious Disease Lab, China-Japan Friendship Hospital, National Center for Respiratory Medicine, Institute of Respiratory Medicine, Chinese Academy of Medical Science, National Clinical Research Center of Respiratory Diseases, Beijing, China. <sup>5</sup>Service de Pneumologie et Soins Intensifs, Hôpital Bicêtre, Assistance Publique-Hôpitaux de Paris (AP-HP), Université Paris-Saclay, Inserm UMR\_S 999, Le Kremlin Bicêtre, France. <sup>6</sup>Pulmonology institute and CF Center, Carmel Medical Center and the Technion-Israel Institute of Technology, Haifa, Israel. <sup>7</sup>Laboratory of Molecular and Cellular Pneumology, Department of Respiratory Medicine, School of Medicine, University of Crete, Heraklion, Greece. <sup>8</sup>Department of Respiratory Medicine, Copenhagen University Hospital-Hvidovre Hospital, Hvidovre, Denmark. <sup>9</sup>European Lung Foundation, Sheffield, UK. <sup>10</sup>Department of Pulmonary and Critical Care Medicine, Center of Respiratory Medicine, China-Japan Friendship Hospital, Chinese Academy of Medical Sciences and Peking Union Medical College, National Clinical Research Center of Respiratory Diseases, Beijing, China. <sup>11</sup>KU Leuven Libraries – 2Bergen – Learning Centre Désiré Collen, Leuven, Belgium. <sup>12</sup>Department of Pulmonary and Critical Care Medicine, Ruijin Hospital, Shanghai, China. <sup>13</sup>Institute of Respiratory Diseases, Shanghai Jiao Tong University School of Medicine, Shanghai, China. <sup>14</sup>Clinic of Respiratory Medicine and Pulmonary Cell Research, University Hospital Basel, Basel, Switzerland. <sup>15</sup>Institute for Lung Health, Leicester NIHR BRC, University of Leicester, Leicester, UK. <sup>16</sup>Medizinische Hochschule Hannover, Hannover, Germany. <sup>17</sup>University of Milan, Department of Pathophysiology and Transplantation, Fondazione IRCCS Ca' Granda Ospedale Maggiore Policlinico, Milan, Italy. <sup>18</sup>Respiratory and Sleep Medicine, Royal Brompton and Harefield NHS Foundation Trust, London, UK. <sup>19</sup>Institute of Social and Preventive Medicine, University Bern, Bern, Switzerland. <sup>20</sup>N. Roche and J.D. Chalmers are task force co-chairs.

Corresponding author: James D. Chalmers ([jchalmers@dundee.ac.uk](mailto:jchalmers@dundee.ac.uk))

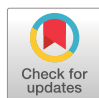

Shareable abstract (@ERSpublications)

**The ERS COVID-19 guidelines make recommendations for corticosteroids, anti-IL-6 monoclonal antibodies, baricitinib, anticoagulation and non-invasive respiratory support for hospitalised patients with COVID-19** <https://bit.ly/3QgHH7U>

**Cite this article as:** Roche N, Crichton ML, Goeminne PC, *et al.* Update June 2022: management of hospitalised adults with coronavirus disease 2019 (COVID-19): a European Respiratory Society living guideline. *Eur Respir J* 2022; 60: 2200803 [DOI: 10.1183/13993003.00803-2022].

This single-page version can be shared freely online.

Copyright ©The authors 2022.

This version is distributed under the terms of the Creative Commons Attribution Non-Commercial Licence 4.0. For commercial reproduction rights and permissions contact [permissions@ersnet.org](mailto:permissions@ersnet.org)

Received: 16 April 2022  
Accepted: 31 May 2022

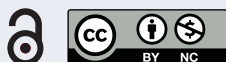

Since the identification of SARS-CoV-2 at the end of 2019, the coronavirus disease 2019 (COVID-19) pandemic has affected more than 410 million people worldwide and killed almost 6 million [1, 2]. The predecessors of COVID-19, *i.e.* the SARS (severe acute respiratory syndrome) and MERS (Middle East respiratory syndrome) outbreaks, had been relatively self-limiting, preventing clinicians and researchers from establishing evidence-based specific therapeutic strategies [3]. Conversely, COVID-19 rapidly proved to be extremely fast spreading, which led stakeholders to encourage, guide, build or fund multidirectional therapeutic research strategies based on both repurposing and development of new agents [4–8]. In parallel, considerable efforts were directed at describing the disease and understanding the underlying mechanisms [9–13]. As a result, there has been a huge generation of evidence, as highlighted by the impressive number of COVID-19 publications (more than 200 000 since the end of 2019). As a consequence, it proved rapidly impossible for any clinician, researcher or decision-maker to gather and analyse all the corresponding literature to derive appropriate guidance [14]. The first step of such a process is to select the relevant high-quality research that can be used to answer the question(s) of interest [15]. Even if limiting the search

to clinical trials, systematic reviews and meta-analyses, almost 4000 papers appear in the PubMed database, as of mid-February 2022. In June and July 2020, the European Respiratory Society (ERS) and the American Thoracic Society (ATS) released early guidance on several aspects of COVID-19 management (*i.e.* rehabilitation, palliative care and acute management); at that time, direct specific evidence was sparse or absent [16–18]. Simultaneously, the ERS launched a living guideline on the management of COVID-19. The format was that of a “short” guideline, as per ERS standards [19, 20], in that the purpose was to release the first iteration within 12 months. However, the number of PICO (Population, Intervention, Comparator, Outcomes) questions to be addressed ( $n=12$ ) already exceeded markedly what the ERS considers as being feasible during such a short timeframe (*i.e.*  $n=1-2$ ), which was a direct consequence of the high number of unanswered issues in the field of acute COVID-19 management, all corresponding to outstanding clinical needs. The first version of these guidelines was published in March 2021 and addressed the following potential therapeutic options: corticosteroids, interleukin (IL)-6 receptor antagonists, hydroxychloroquine, azithromycin and both combined, colchicine, lopinavir-ritonavir, remdesivir, interferon- $\beta$ , anticoagulation and non-invasive ventilatory support [6, 21]. An update of the mortality meta-analyses for corticosteroids, hydroxychloroquine, azithromycin, remdesivir, anti-IL-6 monoclonal antibodies, colchicine, lopinavir/ritonavir and interferon- $\beta$  was published in December 2021 [22].
